# Supplementary material for: Oxygen functional groups improve the energy storage performances of graphene electrochemical supercapacitors
Source: PubMed Central journal article supplement (PMC9077562; doi:10.1039/c7ra12425b), 2018-01-12
Supplement: RA-008-C7RA12425B-s001.pdf [file RA-008-C7RA12425B-s001.pdf]

*Supporting Information for*

**Oxygen functional groups improve the energy storage performances  
of graphene electrochemical supercapacitors**

Hailiang Cao,<sup>\*,a,b</sup> Xing Peng,<sup>a</sup> Min Zhao,<sup>a</sup> Peizhi Liu,<sup>a</sup> Bingshe Xu<sup>a</sup> and Junjie Guo<sup>\*,a</sup>

a Key Laboratory of Interface Science and Engineering in Advanced Materials,  
Ministry of Education, Research Center of Advanced Materials Science and  
Technology, Taiyuan University of Technology, Taiyuan, 030024, China.

b Key Laboratory of Graphene Technologies and Applications of Zhejiang Province,  
Advanced Li-ion Battery Engineering Lab, Ningbo Institute of Materials Technology  
and Engineering (NIMTE), Chinese Academy of Sciences, Ningbo 315201, China.

*\*Corresponding author: E-mail: caohltyut@sohu.com; guojunjie@tyut.edu.cn*

*Fax: +86-531-6010-236; Tel: +86-531-6010-236*

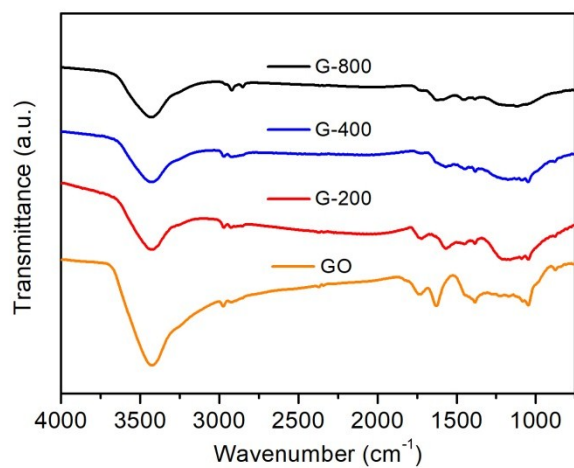

**Fig. S1** FTIR transmittance spectra of GO, G-200, G-400 and G-800.

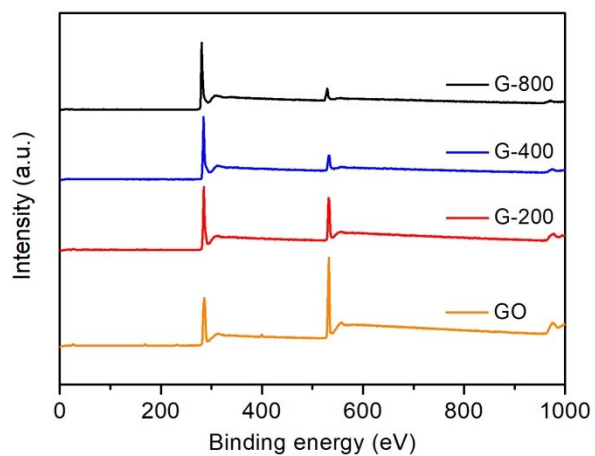

**Fig. S2** XPS spectra of GO, G-200, G-400 and G-800.

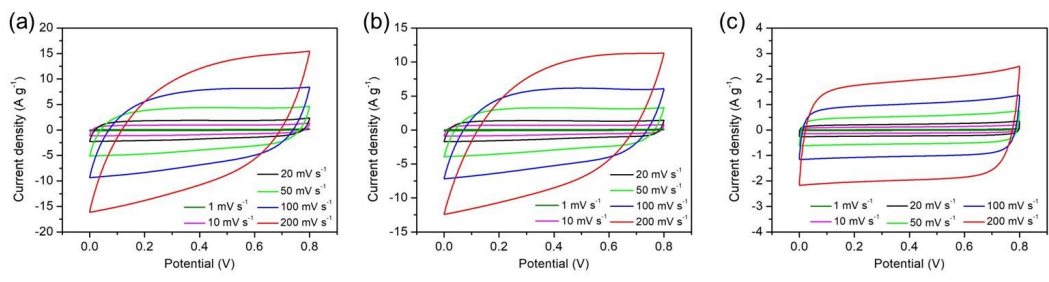

**Fig. S3** CV curves of G-200 (a), G-400 (b) and G-800 (c) electrodes at different scan rates within a potential range of 0-0.8 V in 5 M KOH.

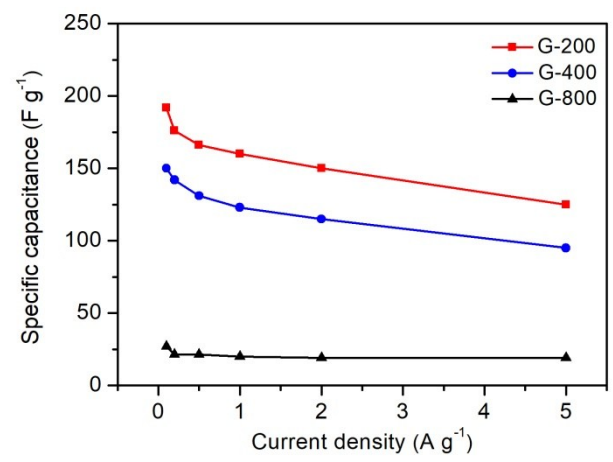

**Fig. S4** Specific capacitance of G-200, G-400 and G-800 at different current densities.

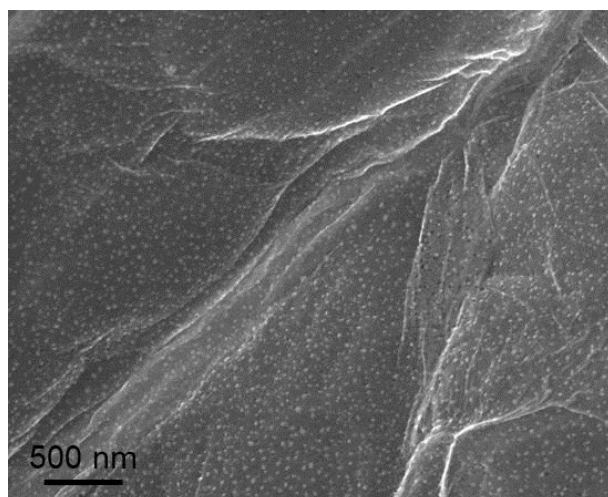

**Fig. S5** SEM image of graphene-Co composite after thermal treatment at 800 °C.

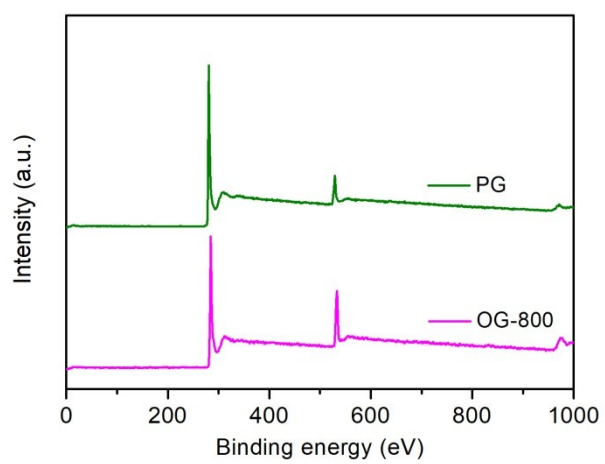

**Fig. S6** XPS spectra of PG and OG-800.

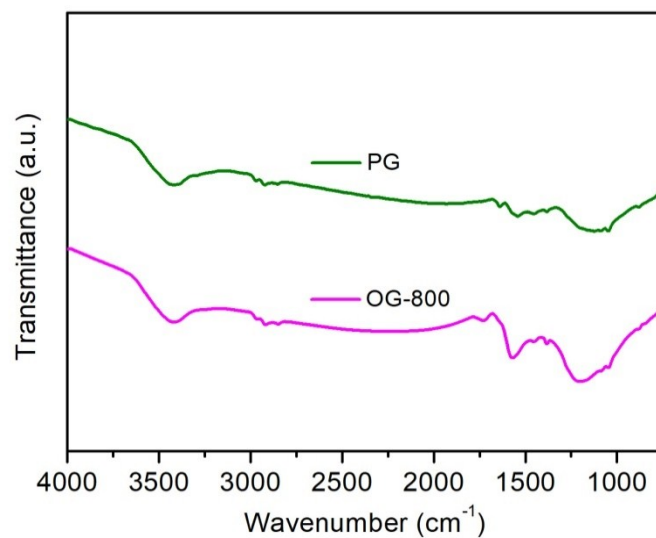

**Fig. S7** FTIR transmittance spectra of OG-800 and PG.

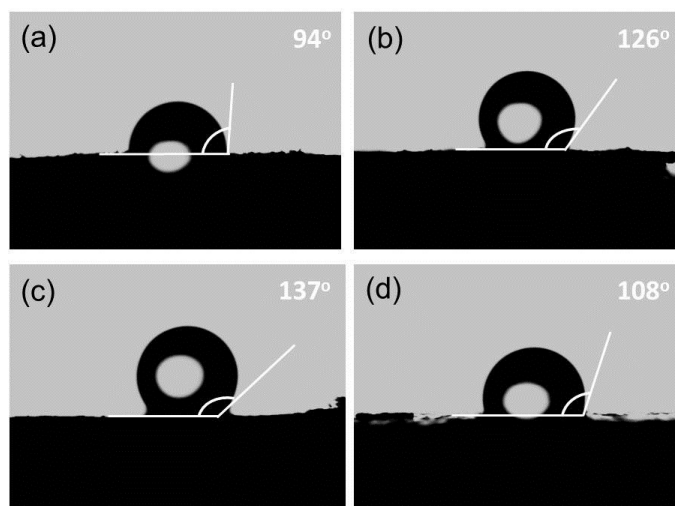

**Fig. S8** Contact angle measurements of G-200 (a), G-400 (b), G-800 (c) and OG-800 (d).

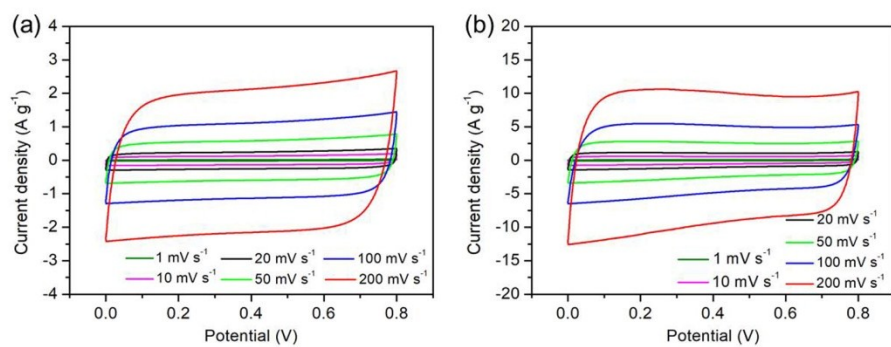

**Fig. S9** CV curves of PG (a) and OG-800 (b) electrodes at different scan rates within a potential range of 0-0.8 V in 5 M KOH.

**Table S1.** Specific surface area,  $I_D/I_G$ , XPS elemental analysis (at. %), XPS data of C1s peaks: binding energies and relative area percentages (in parentheses) and specific capacitance of samples.

| Sample                                             | G-200         | G-400         | G-800         | PG            | OG-800        |
|----------------------------------------------------|---------------|---------------|---------------|---------------|---------------|
| BET surface area (m <sup>2</sup> g <sup>-1</sup> ) | 248           | 302           | 251           | 116           | 240           |
| $I_D/I_G$                                          | 0.96          | 0.94          | 0.93          | 1.04          | 0.92          |
| C                                                  | 80.4          | 89.3          | 93.1          | 93.4          | 86.6          |
| O                                                  | 19.6          | 10.7          | 6.9           | 6.6           | 13.4          |
| C/O                                                | 4.1           | 8.3           | 13.5          | 14.2          | 6.5           |
| C-C                                                | 284.6 (56.55) | 284.6 (59.80) | 284.6 (63.15) | 284.6 (63.23) | 284.6 (60.03) |
| C-OH                                               | 285.8 (16.63) | 285.6 (17.89) | 285.7 (15.82) | 285.8 (15.20) | 285.5 (13.17) |
| C=O                                                | 287.0 (10.9)  | 286.9 (9.40)  | 286.8 (10.02) | 286.9 (8.45)  | 286.8 (11.62) |
| COOH                                               | 289.0 (15.91) | 289.5 (12.91) | 290.0 (11.01) | 289.8 (13.12) | 289.0 (15.18) |
| Capacity (F g <sup>-1</sup> )                      |               |               |               |               |               |
| 20 mV s <sup>-1</sup>                              | 174           | 127           | 23            | 27            | 107           |
